# Supplementary material
Source: PubMed Central journal article supplement (PMC11422896)
Supplement: NIHPP2023.07.21.549993V2-supplement-1.pdf [file NIHPP2023.07.21.549993V2-supplement-1.pdf]

# ***Supplementary Material:*** **Integrative determination of the atomic structure of mutant huntingtin exon 1 fibrils implicated in Huntington's disease**

**Mahdi Bagherpoor Helabad**<sup>1,2</sup>, **Irina Matlahov**<sup>3</sup>, **Raj Kumar**<sup>4</sup>, **Jan O. Daldrop**<sup>5</sup>, **Greeshma Jain**<sup>3</sup>, **Markus Weingarth**<sup>4</sup>, **Patrick C.A. van der Wel**<sup>3,\*</sup> and **Markus S. Miettinen**<sup>1,5,6,7,\*</sup>

<sup>1</sup>*Department of Theory and Bio-Systems, Max Planck Institute of Colloids and Interfaces, 14424 Potsdam, Germany*

<sup>2</sup>*Institute for Drug Discovery, Leipzig University Medical Center, 04103 Leipzig, Germany*

<sup>3</sup>*Zernike Institute for Advanced Materials, University of Groningen, Groningen, The Netherlands*

<sup>4</sup>*Utrecht University, Utrecht, The Netherlands*

<sup>5</sup>*Fachbereich Physik, Freie Universität Berlin, 14195 Berlin, Germany*

<sup>6</sup>*Department of Chemistry, University of Bergen, 5007 Bergen, Norway*

<sup>7</sup>*Computational Biology Unit, Department of Informatics, University of Bergen, 5008 Bergen, Norway*

\*Corresponding authors:  
p.c.a.van.der.wel@rug.nl; markus.miettinen@iki.fi

Sunday 15<sup>th</sup> September, 2024

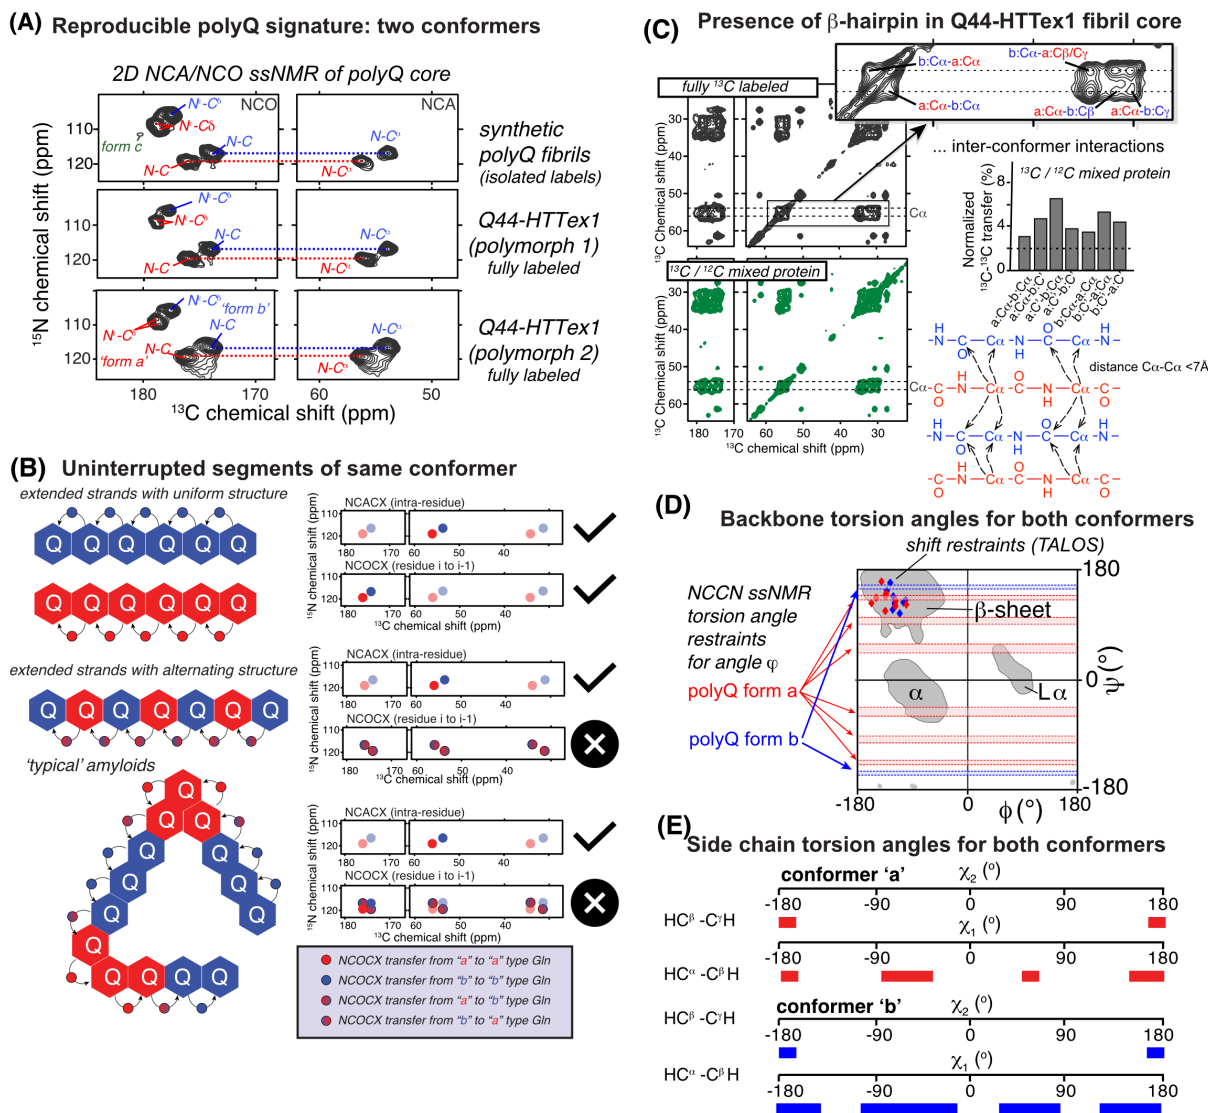

**Figure S1. Summary of key structural data from prior solid-state NMR studies.** (A) 2D spectra showing the nitrogen–carbon correlations in the polyQ backbone and side chains, comparing three different types of fibrils. The left column shows NCO spectra, with correlations for N–C $\delta$  groups in the Gln side chain, and the backbone nitrogen of one Gln with the backbone CO of the preceding amino acid. To the right, NCA spectra show correlations between the backbone N and the C $\alpha$  (intra-residue). The top spectra are for synthetic polyQ peptides with two  $^{13}\text{C}$ ,  $^{15}\text{N}$ -labeled Gln residues, and bottom rows show two different types of Q44-HTTex1 fibrils. Adapted from Van der Wel (2024)<sup>1</sup>. (B) Peak patterns in the NCA and NCO spectra inform on the connectivity between the two polyQ core conformers. This is illustrated based on three hypothetical models, in which the “a”/“b” conformers form uninterrupted segments (top), alternate in a systematic manner (middle), or form more complex patterns (as in typical amyloid fibril structures). Images on the right illustrate expected peak patterns in NCA/NCO spectra. The NCA spectra (intra-residue peaks) are always unchanged, but the NCO spectra show distinct peak patterns. Only the top model fits the observed data. Figure adapted from Boatz et al. (2020)<sup>2</sup>. (C) The presence of a  $\beta$ -hairpin structure in Q44-HTTex1 fibrils was previously demonstrated by NMR comparison of fully  $^{13}\text{C}$ -labeled and mixed  $^{13}\text{C}/^{12}\text{C}$  protein fibrils; see ref<sup>3</sup> for details. Figure adapted from Hoop et al (2016)<sup>3</sup>. (D) Backbone torsion angles were determined by combination of chemical shift analysis and dipolar recoupling measurements. This figure summarizes these data in a Ramachandran plot. Adapted from Van der Wel (2024)<sup>1</sup>, based on data from Hoop et al (2016)<sup>3</sup>. (E) Summary of MAS NMR side chain dihedral angle constraints via dipolar recoupling of CH couplings. Adapted with permission from ref<sup>3</sup>. Readers are also referred to a recent comprehensive review on this topic.<sup>1</sup>

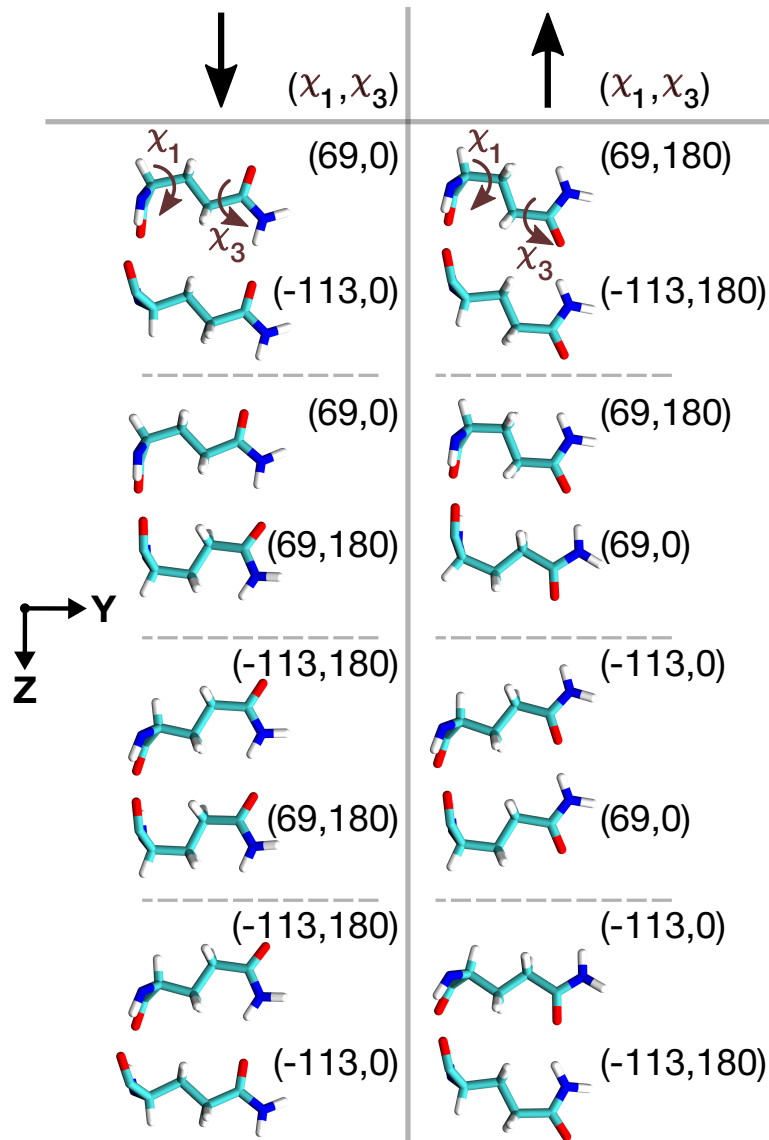

**Figure S2. Schematic visualization of the eight  $(\chi_1, \chi_3)$  rotamer classes** of a Gln–Gln pair, in which a side-chain–side-chain hydrogen bonding interaction could take place. The side-chains of the pair are located on neighbouring  $\beta$ -strands of an antiparallel  $\beta$ -sheet inside the polyQ amyloid core. The shown snapshots of these eight unique pairs are taken from the dihedral-restraint-equilibrated conformations, where the dihedral angles  $(\chi_1, \chi_3)$  are restrained to their initial values (listed next to the corresponding sidechain, see also Supplementary Fig. S3). Depending on the H-bond direction, the eight distinct structural classes are categorized into two forms:  $\downarrow$  and  $\uparrow$ .

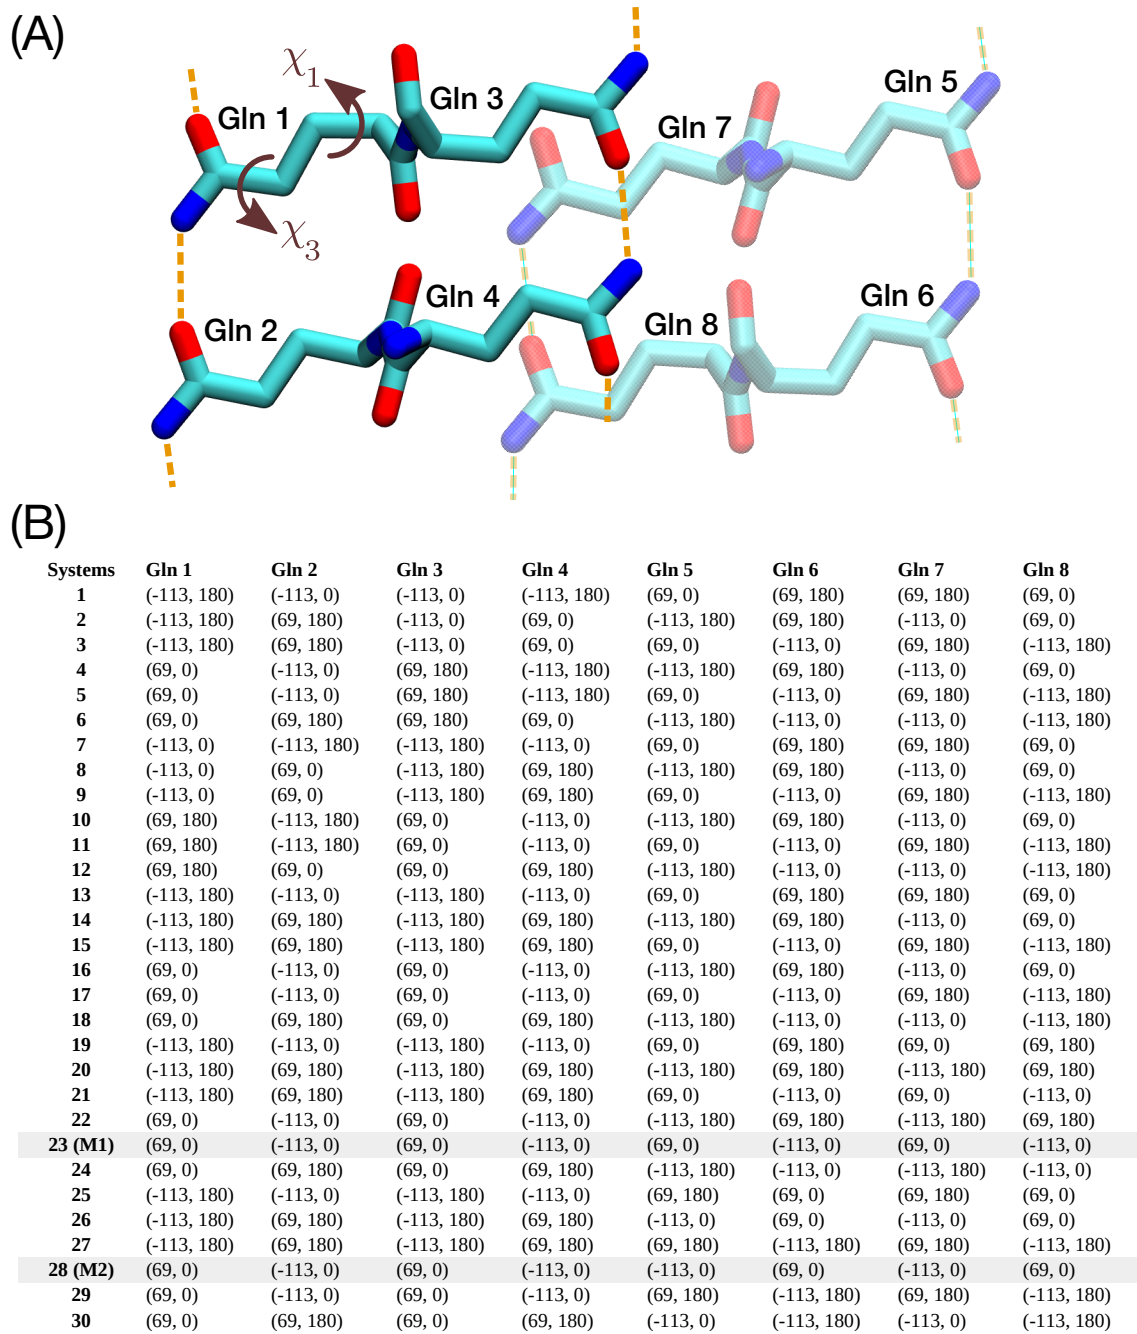

**Figure S3. (A) Illustration of the molecular architecture of the eight-glutamine (Gln) building block, which forms the basis for generating plausible polyQ amyloid core structures. (B) Initial dihedral angle pairs ( $\chi_1$ ,  $\chi_3$ ) of eight Gln residues in a unit cell, for the 30 structurally distinct polyQ amyloid core candidates, with models *M1* and *M2* highlighted in gray. These initial configurations serve as the starting points for molecular dynamics (MD) simulations, aiming to explore the stability of each candidate structure.**



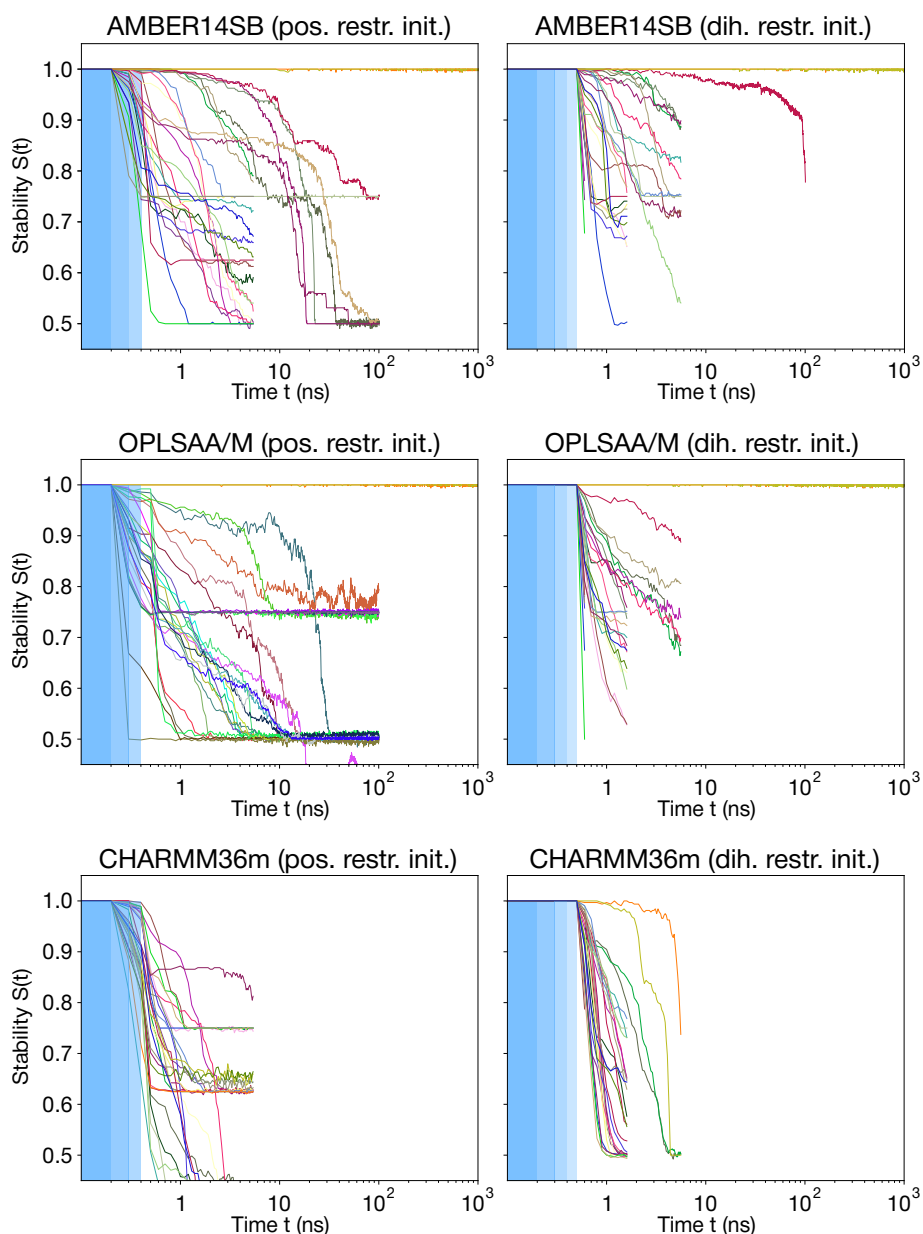

**Figure S4.** Stabilities  $S(t)$  (see Eq. (1) in main text Methods) as a function of MD simulation time  $t$  for the 30 experimentally-feasible polyQ core candidates (colored lines). The blue-shaded areas indicate the gentle initiating protocol (of applying structural restraints that are gradually removed—such that on the non-shaded area no restraints remain) used to assure that no de-facto-inconsequential incompatibilities between an ideal candidate structure and the force field would lead the structure losing stability during the first few simulation steps. The three blue-shaded areas in the left column indicate three consecutive 100-ps simulations with restraints of 1 000, 500, and 100 kJ/mol/nm<sup>2</sup> on heavy (non-H) atom positions. The four blue-shaded areas in the right column indicate restraints of 1 000, 500, 250, and 100 kJ/mol/rad<sup>2</sup> on  $\chi_1$  and  $\chi_3$  dihedral angles. The top left panel shows the first 1  $\mu$ s of main text Fig. 2B.

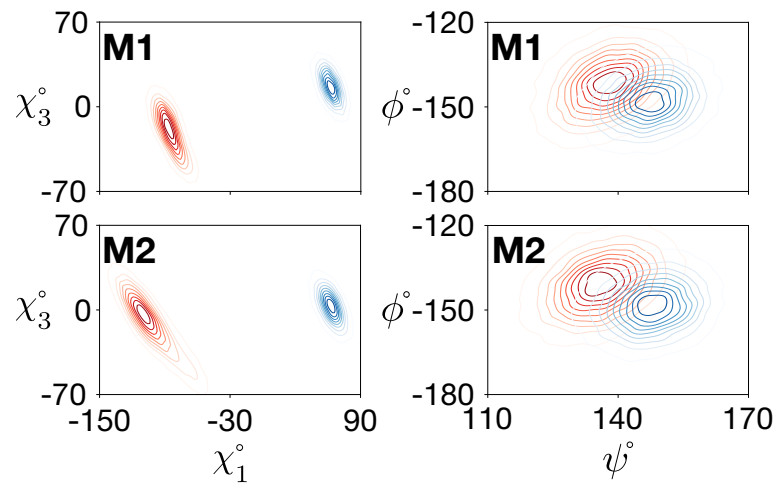

**Figure S5.** The side-chain  $\chi_1$ - $\chi_3$  (left panels) and backbone  $\psi$ - $\phi$  (right) dihedral angle distributions of conformers “a” (red) and “b” (blue) for the final models *M1* (top) and *M2* (bottom). Calculations were performed using the OPLSAA/M force field; for Amber14SB see main text Fig. 2D.

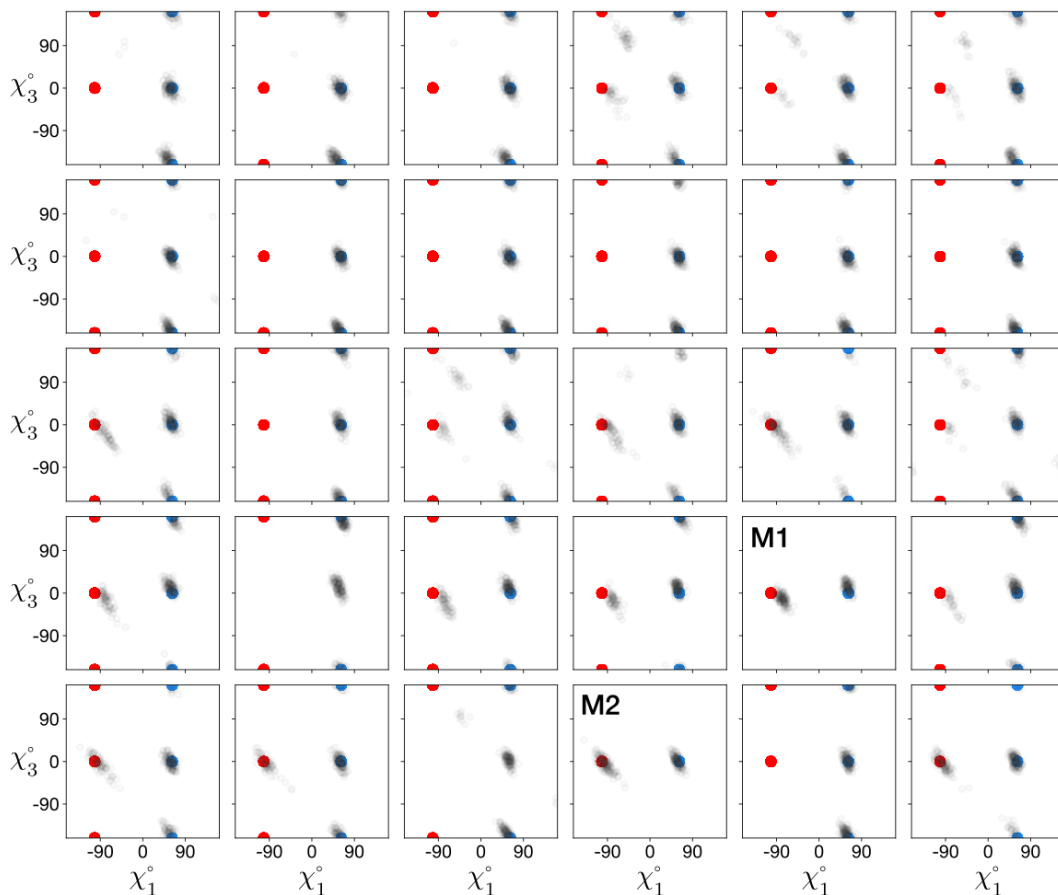

**Figure S6.** Dihedral angle distributions of  $\chi_1$  and  $\chi_3$  for 30 structurally distinct polyQ amyloid core candidates. The gray distributions represent the dihedral angles of the last frames from the 30 MD simulations. The red and blue points indicate the initial  $\chi_1$  and  $\chi_3$  dihedral angles for the two populated conformers “a” and “b”, respectively.

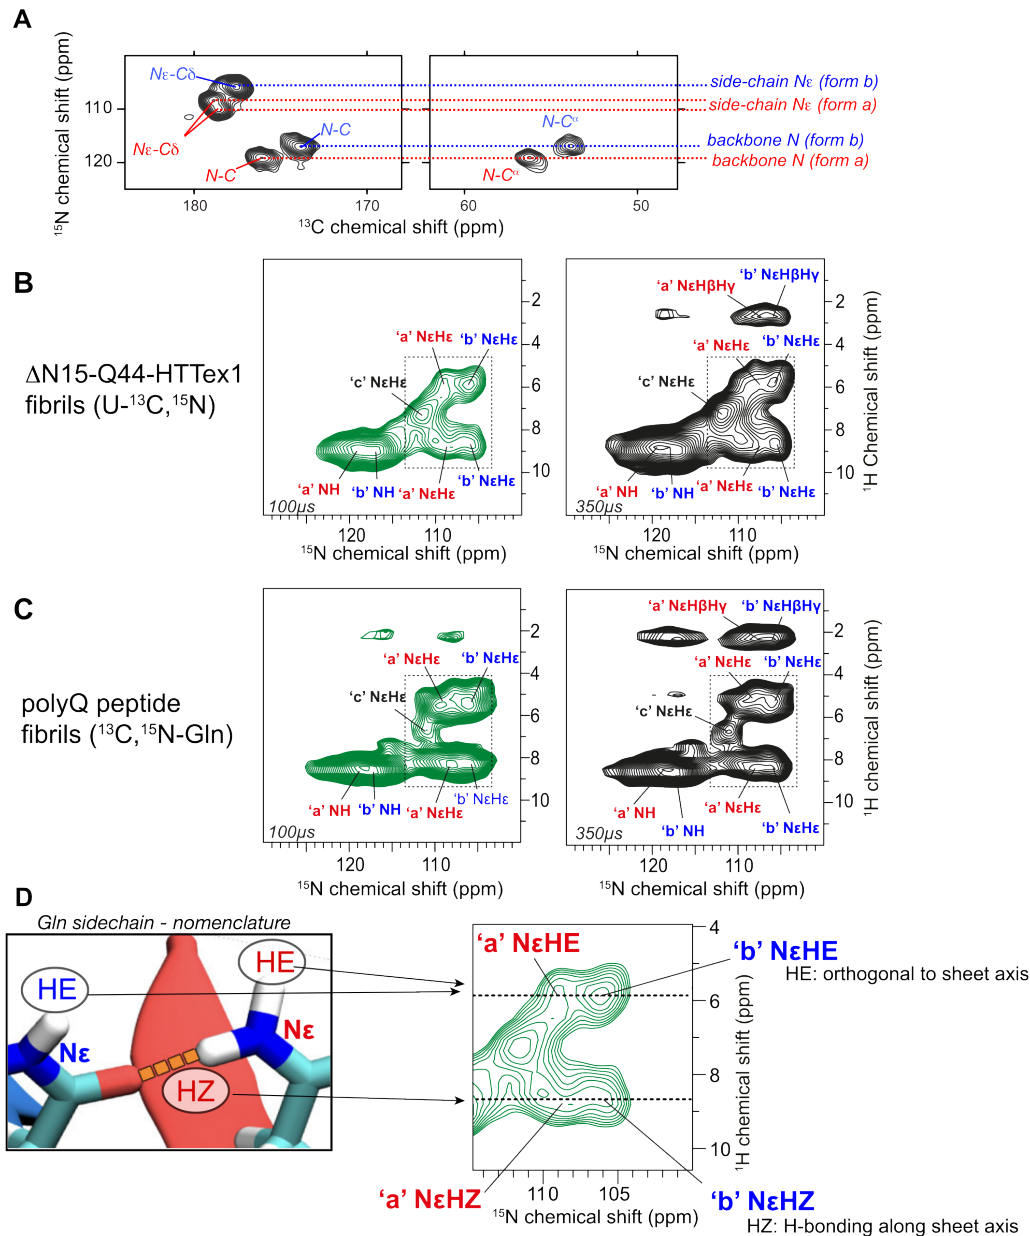

**Figure S7. MAS NMR assignment spectra for the Gln side chain protons in the polyQ core.** (A) NCA and NCO spectra reproduced from Supplementary Figure S1A (top), showing the nitrogen–carbon correlations from polyQ core residues. The a and b conformers are color-coded as usual (a= red; b=blue). Dashed lines mark the  $^{15}\text{N}$  chemical shifts that we can thus assign, for the backbone (near 120 ppm) and side chain (near 105–110 ppm). (B)  $^{15}\text{N}$ -detected 2D HN correlation spectra for fully labeled  $\Delta$ N15-Q44-HTTex1 fibrils, obtained by trypsin cleavage. The  $^{15}\text{N}$  assignments from panel (A) allow the identification and assignment of the corresponding peaks. The spectrum at the left was recorded with 0.1 ms contact time (showing directly bonded correlations); the right one 0.35 ms contact time (adding some longer range peaks involving nearby carbon-attached protons). (C)  $^{15}\text{N}$ -detected 2D HN correlation spectra for polyQ peptide fibrils ( $\text{K}_2\text{Q}_{11}\text{pGG}_{11}\text{K}_2$ ; see Methods section) outfitted only with labeled Gln residues (thus avoiding signals from non-Gln residues). Comparison of the panels B and C shows that the polyQ peptide has the same spectroscopic (and thus structural) features. The close correspondence shows also that the observed peaks for the protein are indeed explained by the polyQ core. (D) HE and HZ nomenclature<sup>4</sup> for Gln-ladder hydrogen bonding (see also main text), illustrated and mapped onto the polyQ core signals from panel B (right).

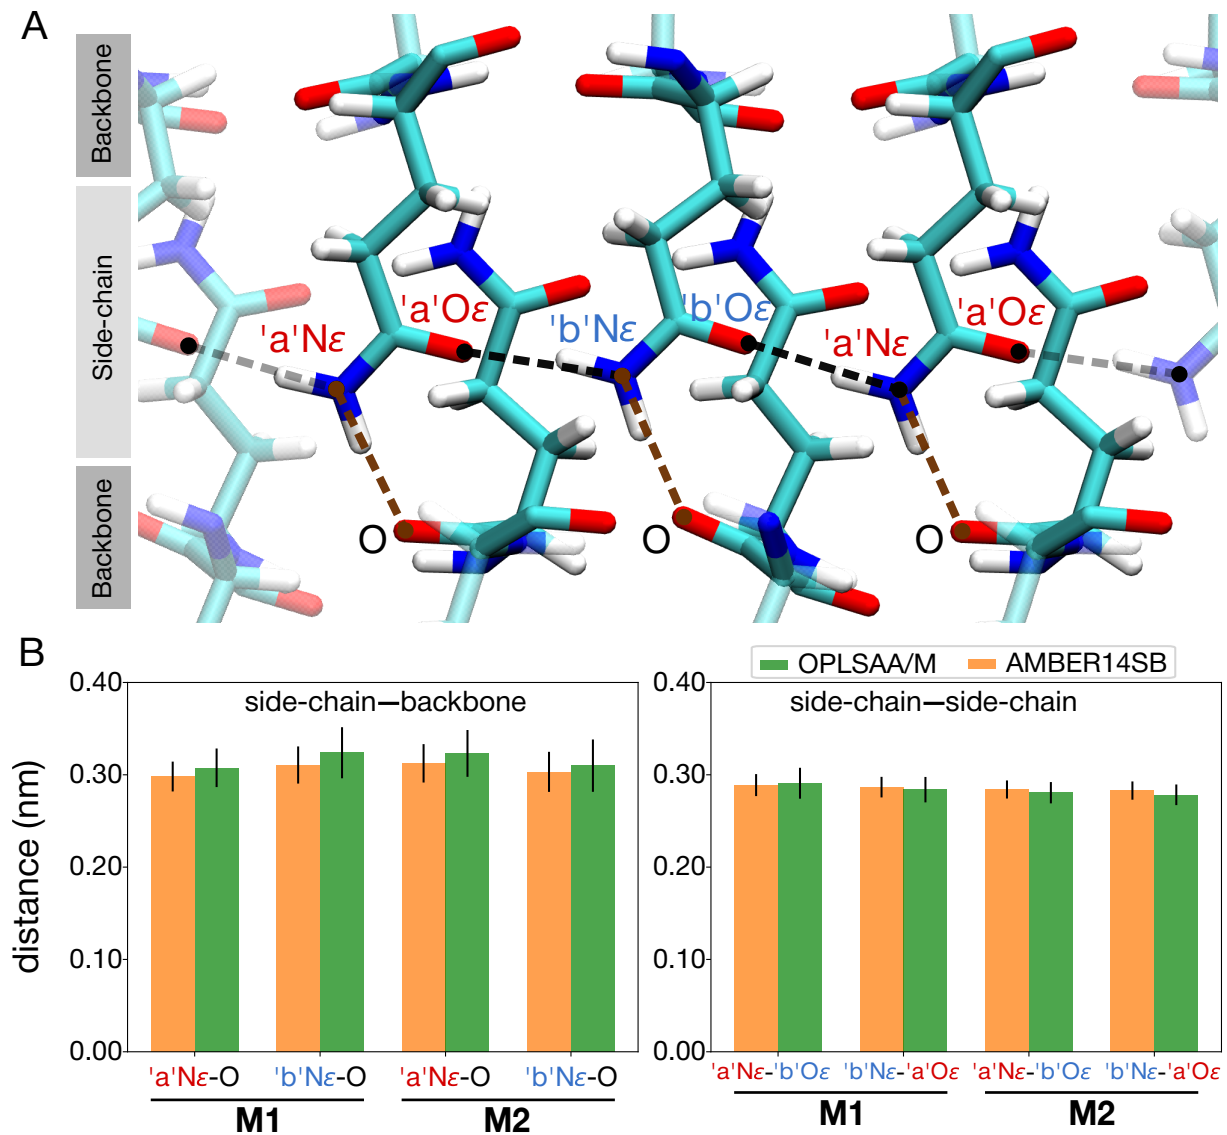

**Figure S8.** (A) Spatial arrangement of the side-chain and backbone atoms in the polyQ amyloid core model *M2*. Dashed lines represent the distances between the N $\epsilon$  atoms of the “a” and “b” types of Gln residues and their nearest backbone O atoms (brown), reflecting the H<sub>E</sub> nomenclature discussed in the main text.<sup>4</sup> Black dashed lines show the N $\epsilon$ -O $\epsilon$  distances between side-chains, reflecting the H<sub>Z</sub> amide hydrogens. (B) Side-chain—backbone distances (left panel), i.e., the distances between the N $\epsilon$  atoms of the “a” and “b” types of Gln residues and their closest backbone O atoms (indicative of H<sub>E</sub> intersheet H-bonding). Side-chain—side-chain distances (right panel), i.e., the N $\epsilon$ -O $\epsilon$  distances between the side chains, either from “a” to “b” or from “b” to “a” (indicative of H<sub>Z</sub> intrasheet H-bonding). The calculations are presented for both the *M1* and *M2* models, using two force fields: OPLSAA/M (green) and AMBER14SB (orange); error bars show standard deviation.

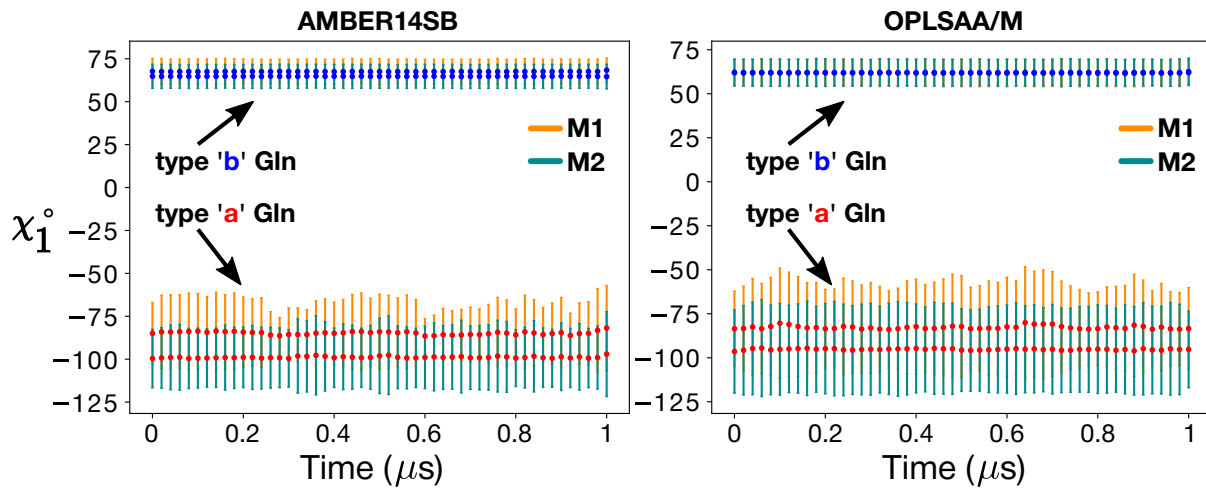

**Figure S9.** Both polyQ<sub>15</sub> models *M1* (orange) and *M2* (green) remained stable throughout 1- $\mu\text{s}$  MD simulations in both the AMBER14SB (left) and OPLSAA/M (right) force fields. Shown are the mean  $\chi_1$  dihedral angles in type “a” (red) and “b” (blue) Gln side-chains, calculated over consecutive 20-ns windows; error bars show standard deviation.

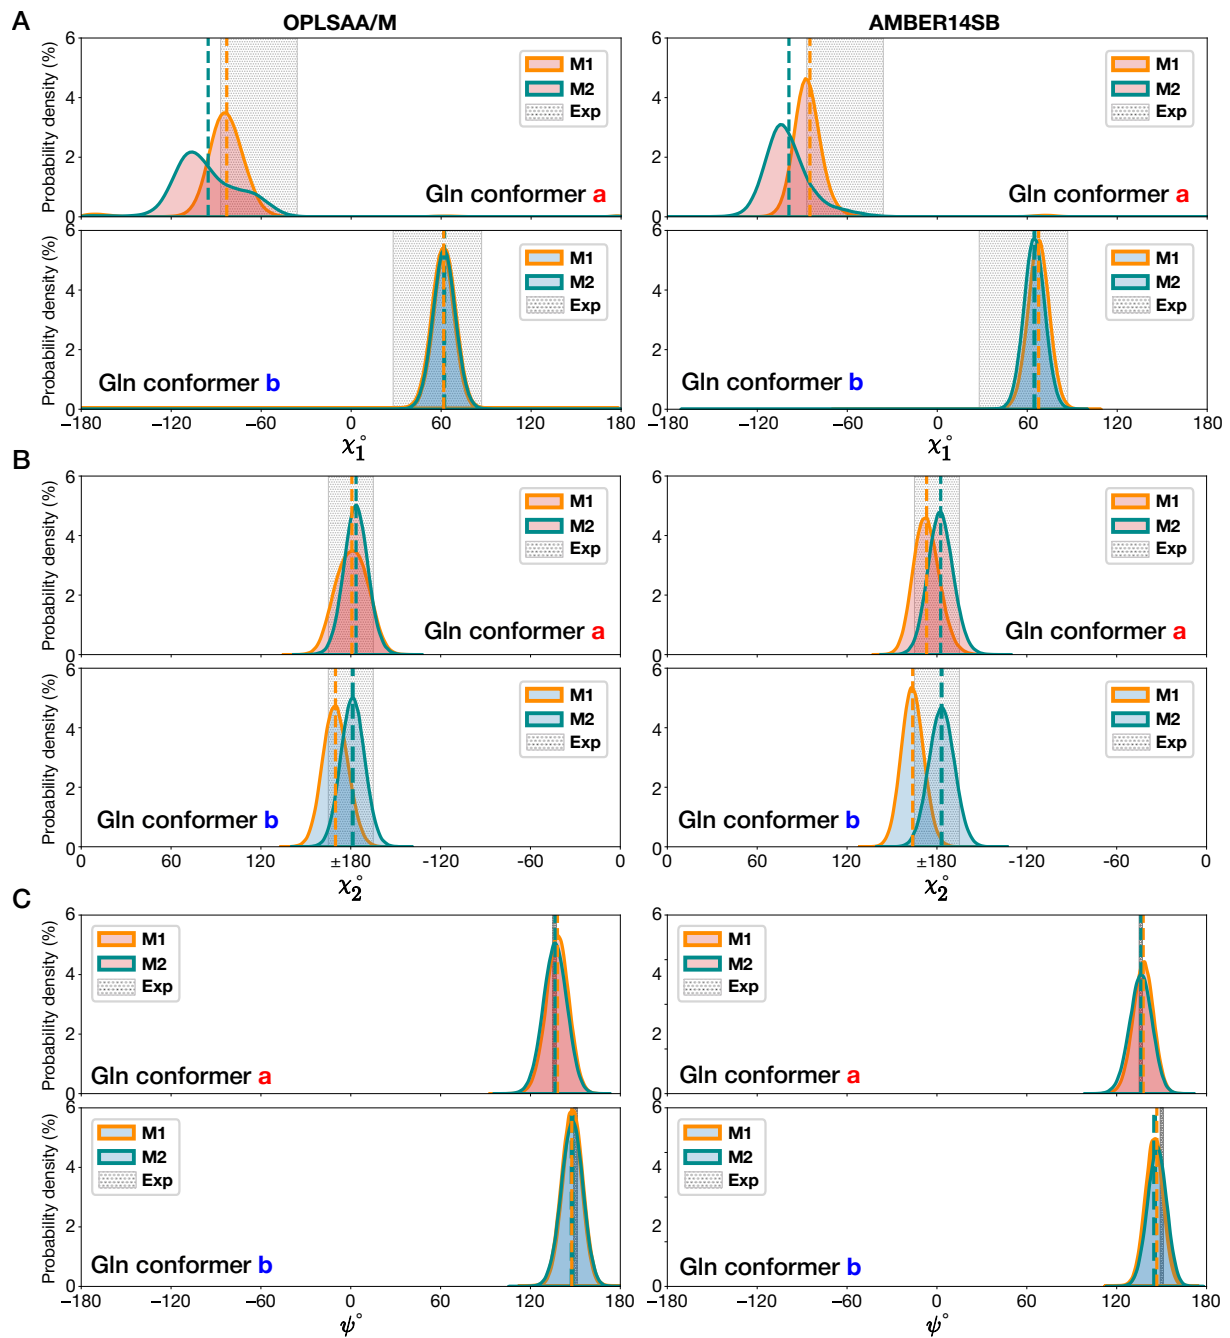

**Figure S10.** Distributions of the (A)  $\chi_1$ , (B)  $\chi_2$ , and (C)  $\psi$  dihedral angles in the *M1* (orange lines) and *M2* (green lines) models of the  $D_2Q_{15}K_2$  fibril obtained from 1- $\mu$ s MD simulations using the OPLSAA/M (left) and AMBER14SB (right) force fields. The upper panels show the type “a” conformers (red-shaded distributions) and the lower panels the type “b” (blue-shaded). The gray-shaded regions represent the ssNMR-informed constraints. The dashed vertical lines depict the mean values of the corresponding dihedral angles.



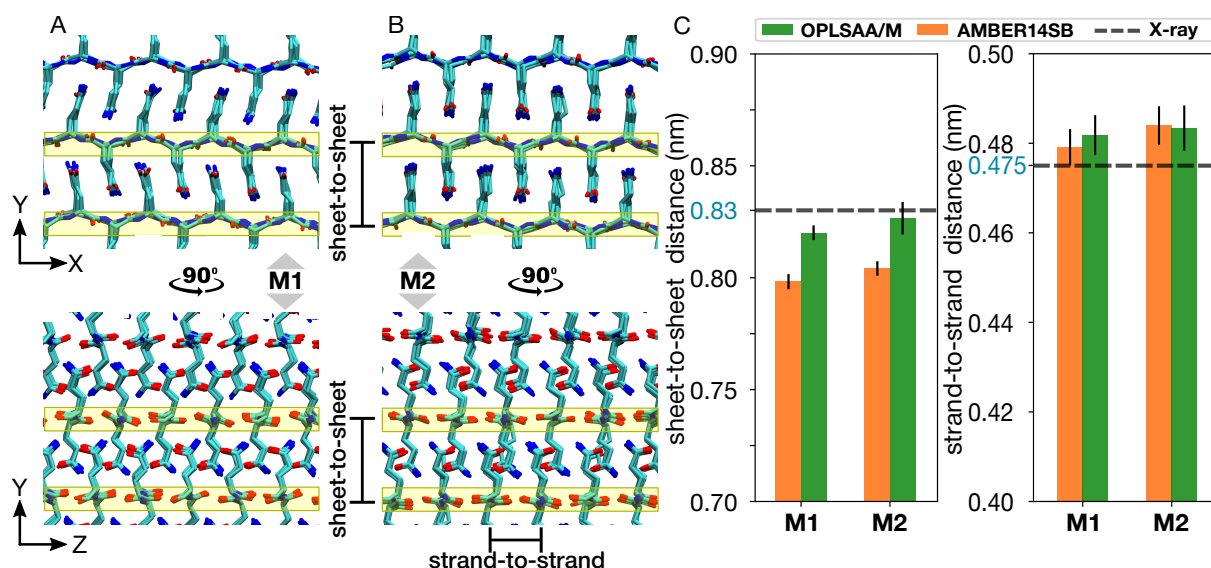

**Figure S11. Illustration of the structural differences between the (A)  $M1$  and (B)  $M2$  models**, visualized through views along the fibril axis  $z$  (top panels) and along the  $\beta$ -strand direction  $x$  (bottom panels). The yellow boxes highlight backbone atoms. (C) Sheet-to-sheet (left panel) and strand-to-strand (right panel) distances calculated for both the  $M1$  and  $M2$  models of polyQ<sub>15</sub> using the AMBER14SB (orange) and OPLSAA/M (green) force fields. The dashed black horizontal lines corresponds to the data obtained from X-ray experiments<sup>5,6</sup>. Error bars represent standard deviation.

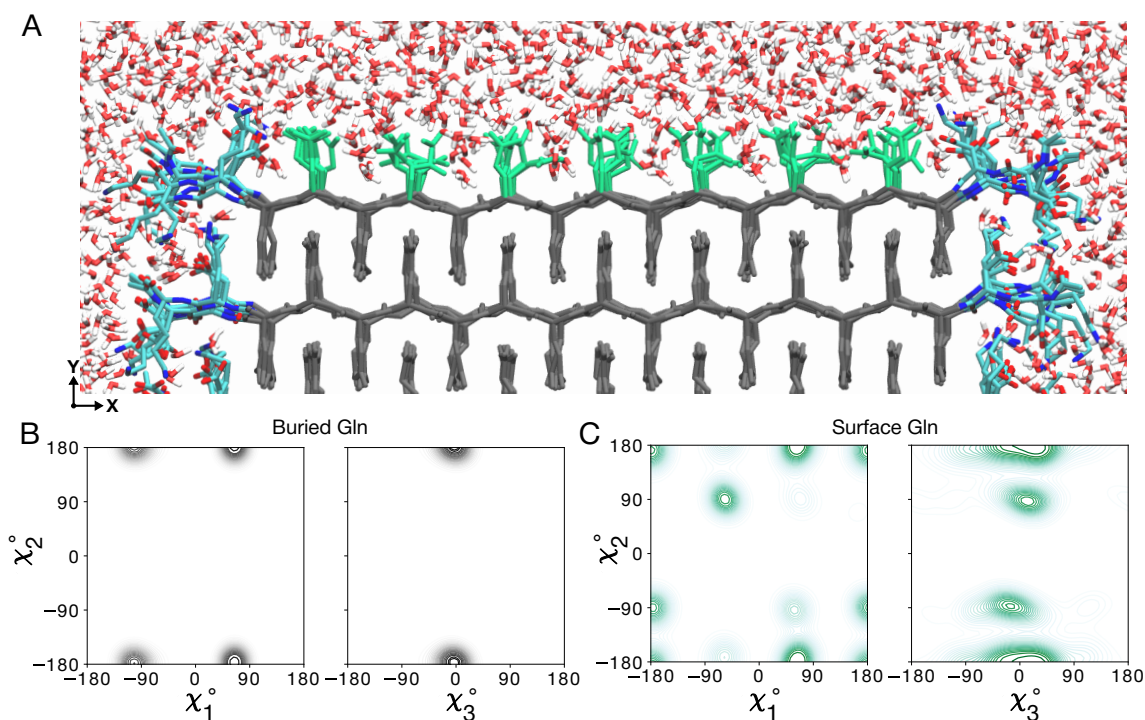

**Figure S12. Water-facing surface of polyQ amyloid.** (A) Atomistic MD snapshot of the D<sub>2</sub>Q<sub>15</sub>K<sub>2</sub> peptide fibril's polyQ surface in contact with water. Exposed and buried Gln residues are colored green and gray, respectively. Note how the Gln side-chains internal to the (model  $M2$ ) amyloid core are well-ordered, while the water-facing side-chains display more mobility. (B) Side-chain dihedral angle distributions for the buried Gln residues and (C) for the Gln residues on the fibril surface (Amber14SB<sup>7</sup>). The surface-facing residues show more disorder, but are nonetheless constrained to eight varyingly prominent specific rotamer states.

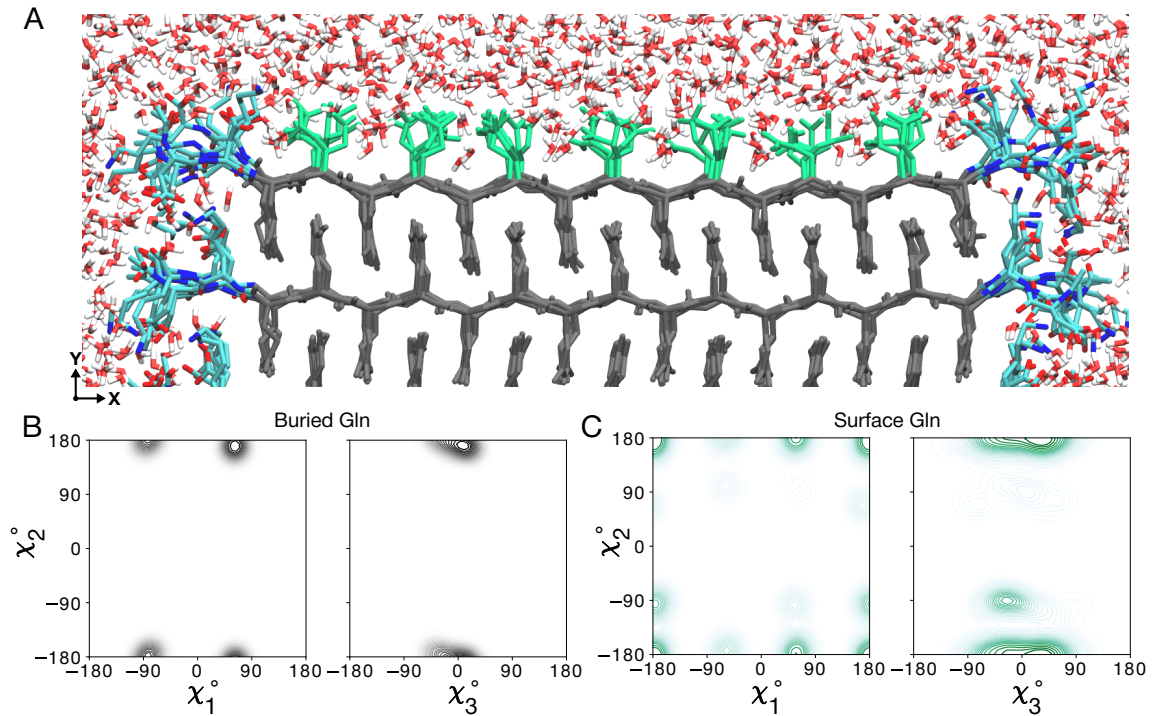

**Figure S13. Water-facing surface of polyQ amyloid.** (A) Atomistic MD snapshot of the  $D_2Q_{15}K_2$  peptide fibril's polyQ surface in contact with water. Exposed and buried Gln residues are colored green and gray, respectively. Note how the Gln side-chains internal to the (model *M1*) amyloid core are well-ordered, while the water-facing side-chains display more mobility. (B) Side-chain dihedral angle distributions for the buried Gln residues and (C) for the Gln residues on the fibril surface (OPLSAA/*M*<sup>8</sup>). The surface-facing residues show more disorder, but are nonetheless constrained to eight varying prominent specific rotamer states.

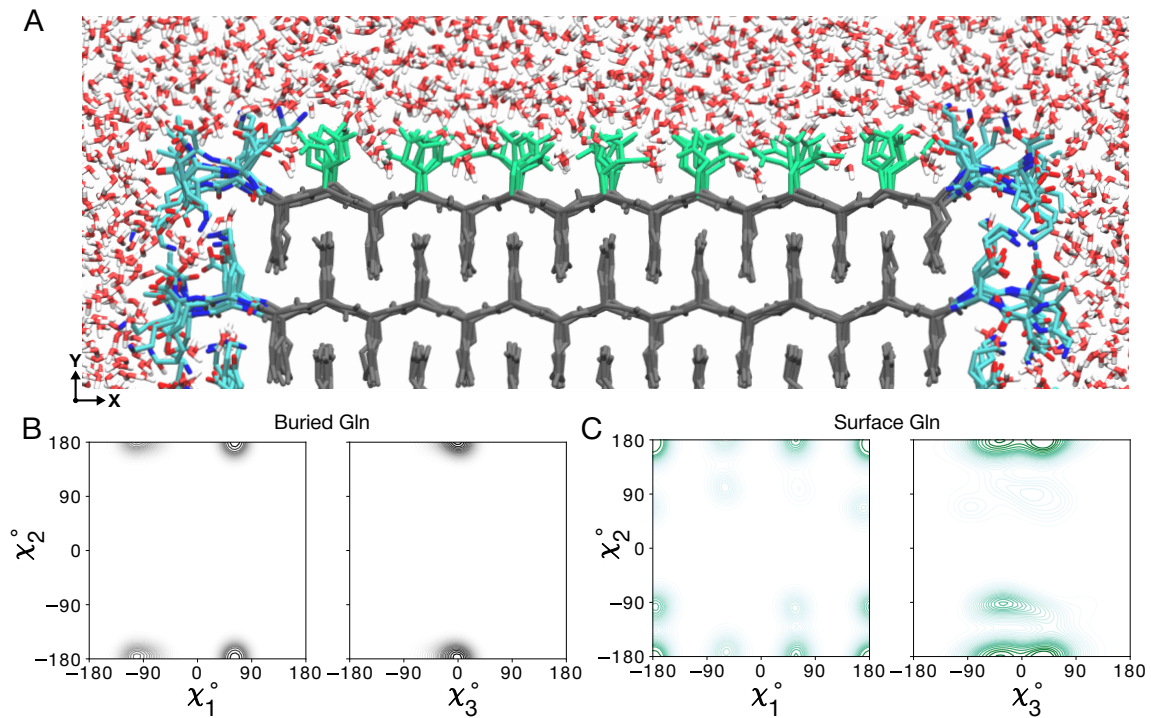

**Figure S14. Water-facing surface of polyQ amyloid.** (A) Atomistic MD snapshot of the  $D_2Q_{15}K_2$  peptide fibril's polyQ surface in contact with water. Exposed and buried Gln residues are colored green and gray, respectively. Note how the Gln side-chains internal to the (model  $M2$ ) amyloid core are well-ordered, while the water-facing side-chains display more mobility. (B) Side-chain dihedral angle distributions for the buried Gln residues and (C) for the Gln residues on the fibril surface (OPLSAA/ $M^8$ ). The surface-facing residues show more disorder, but are nonetheless constrained to eight varyingly prominent specific rotamer states.

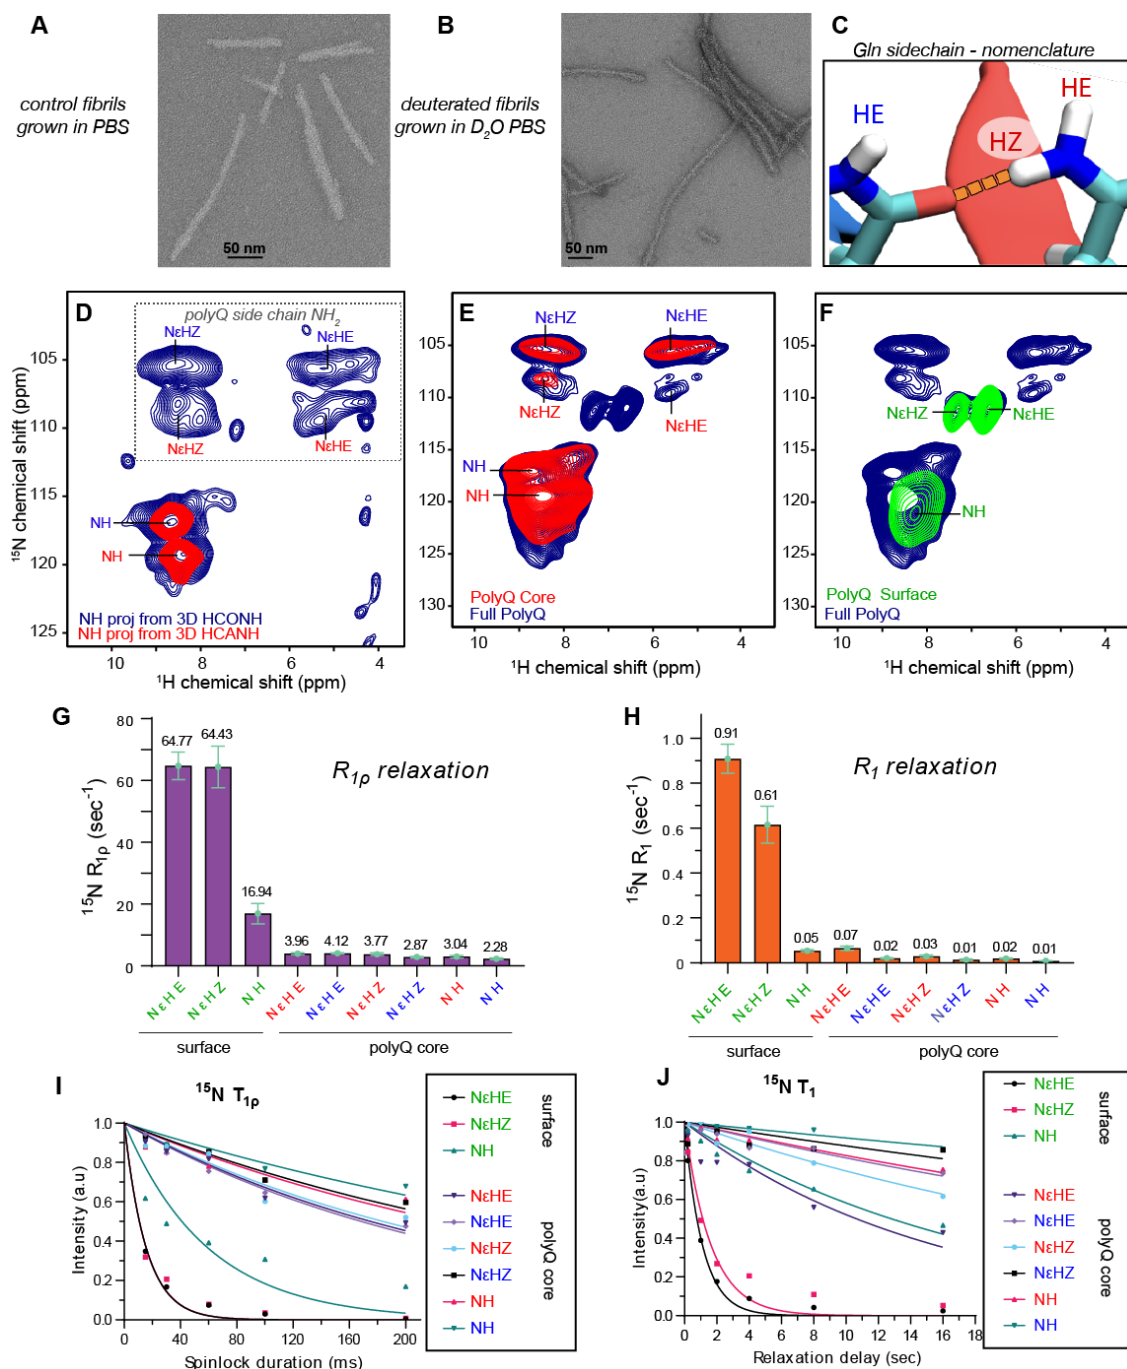

**Figure S15. MAS NMR of core and surface polyQ residues of Q44-HTTex1 fibrils submitted to HDX.** (A,B) Negative stain TEM of Q44-HTTex1 fibrils prepared in regular (protonated) PBS buffer (A), or in PBS buffer made with D<sub>2</sub>O (B). (C) Illustration of the HE vs HZ nomenclature used for the NH<sub>2</sub> hydrogens in the Gln ladders (see also main text). (D) 2D projections of 3D <sup>1</sup>H-detected HCONH and HCANH 3D spectra for fully protonated Q44-HTTex1 fibrils. These spectra can be compared to the <sup>15</sup>N-detected spectra in Supplementary Fig. S7, and are predominantly derived from the polyQ amyloid core of these HTTex1 fibrils. (E) Overlay of <sup>1</sup>H-detected 2D HN spectra for fully protonated (blue) and surface-deuterated HTTex1 fibrils. These data are obtained for fibrils grown in regular protonated PBS, which were washed with deuterated PBS prior to MAS NMR analysis. Thus, exchangeable protons should disappear, but protected amide groups are visible (i.e., the polyQ core internals). (F) Analogous data for fibrils grown in deuterated PBS and washed with regular PBS prior to NMR analysis, showing only exchangeable amide signals that we attribute to the polyQ surface. (G–H) Bar graphs of <sup>15</sup>N T<sub>1ρ</sub> and T<sub>1</sub> relaxation data for core and surface signals. (I–J) Relaxation decay curves related to panels G–H. Data measured at 60 kHz MAS, 700 MHz, 253K setpoint temperature.



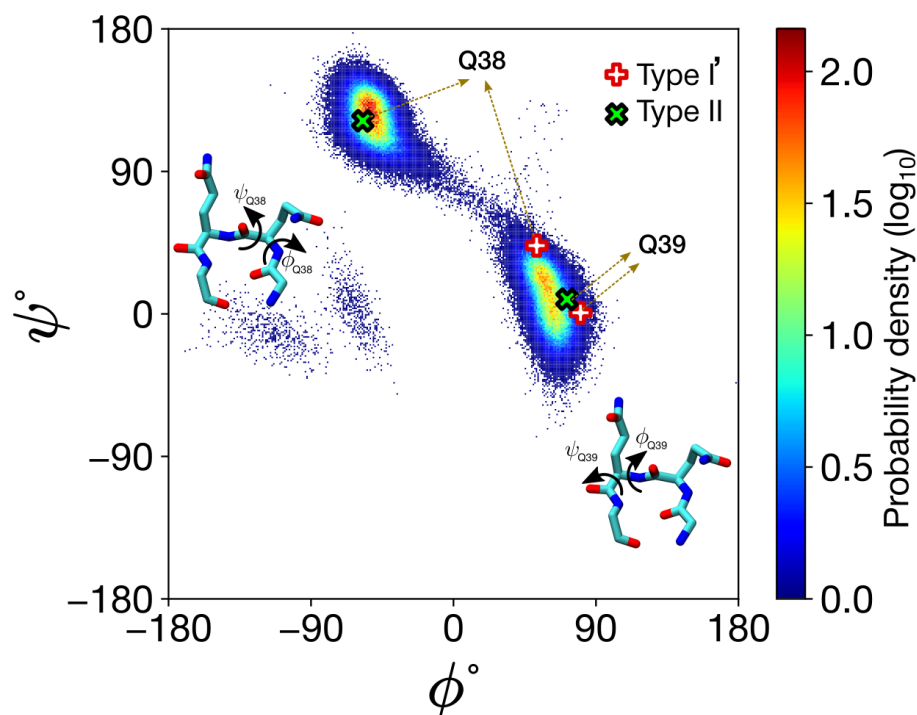

**Figure S16. Ramachandran plot for the  $\beta$ -turn residues (Q38 and Q39) in the Q44-HTTex1 polyQ amyloid core.** The distribution was obtained over the last 1  $\mu$ s of the 5- $\mu$ s MD simulation. The  $\beta$ -turn was initially prepared as a type I' conformer (whose canonical dihedrals are indicated with the red/white plus-signs); however, during the simulation it transitioned to the type II (black/green crosses).

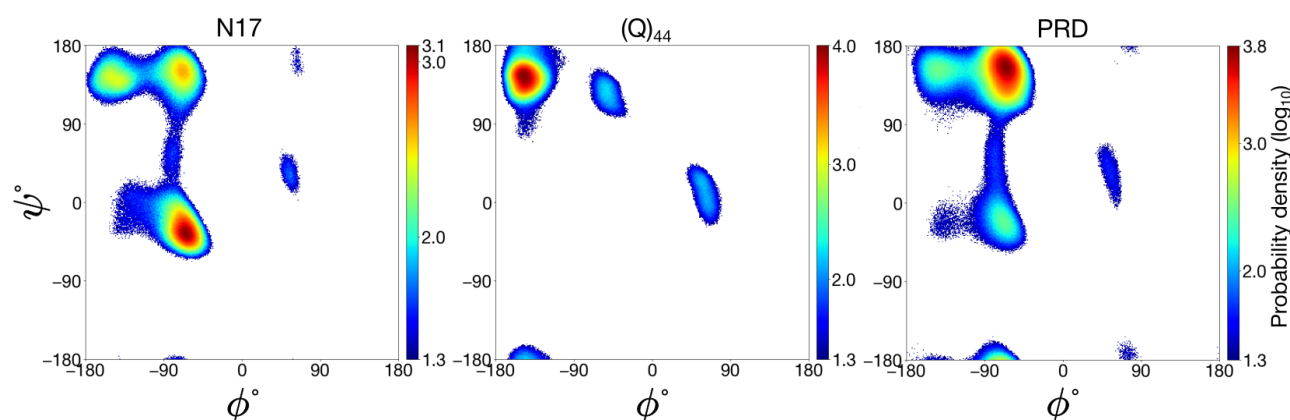

**Figure S17. Ramachandran plots of the N17, Q<sub>44</sub>, and PRD domains** elucidate the characteristic secondary structures present in these three disparate domains of the HTTex1 protein:  $\alpha$ -helical,  $\beta$ -sheet, and PPII-helical, respectively. The distributions were obtained over the last 1  $\mu$ s of the 5- $\mu$ s MD simulation. For clarity,  $\log_{10}$ (probability density) values below 1.3, characterized primarily by noise, have been excluded.

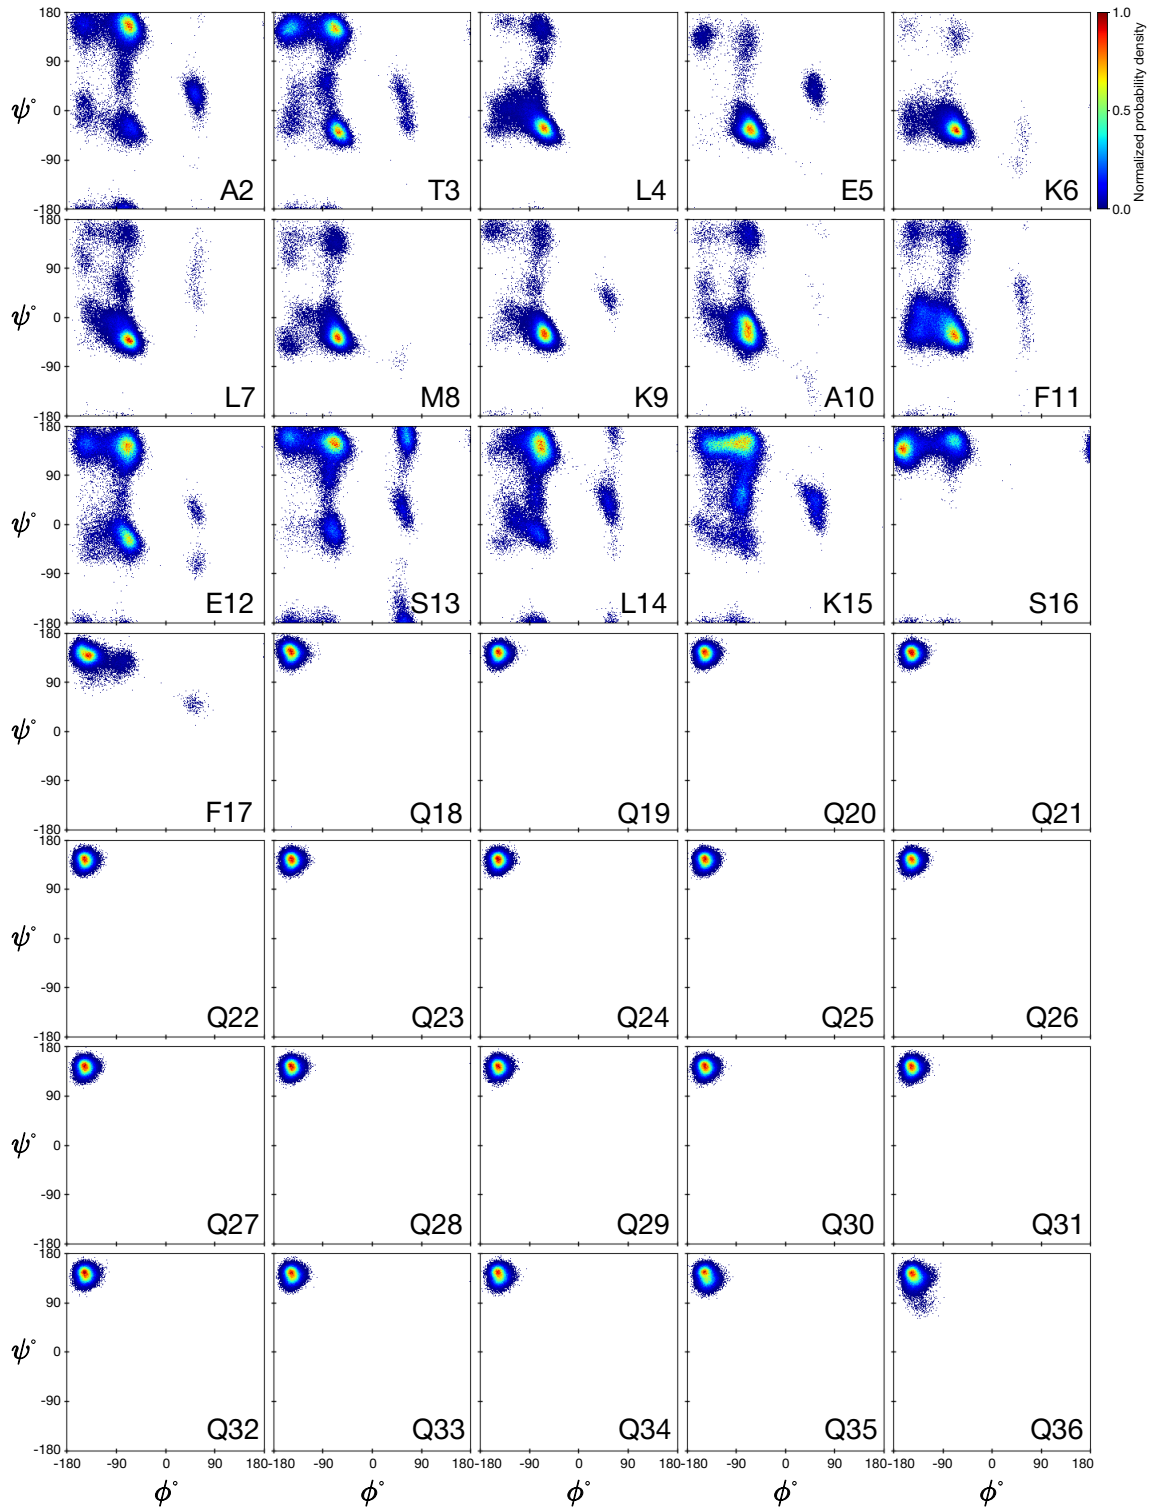

**Figure S18. Ramachandran plots for residues 2–36 in the Q44-HTTex1 fibril.** The plots showcase the conformational space explored by each individual residue, revealing variations in backbone torsion angles across the protein structure. The colorbar is calibrated such that a normalized value of 1 corresponds to the bin with the highest frequency among all protein residues. Each bin spans one degree in both  $\phi$  and  $\psi$ . The distributions were obtained over the last 1  $\mu$ s of the 5- $\mu$ s MD simulation.



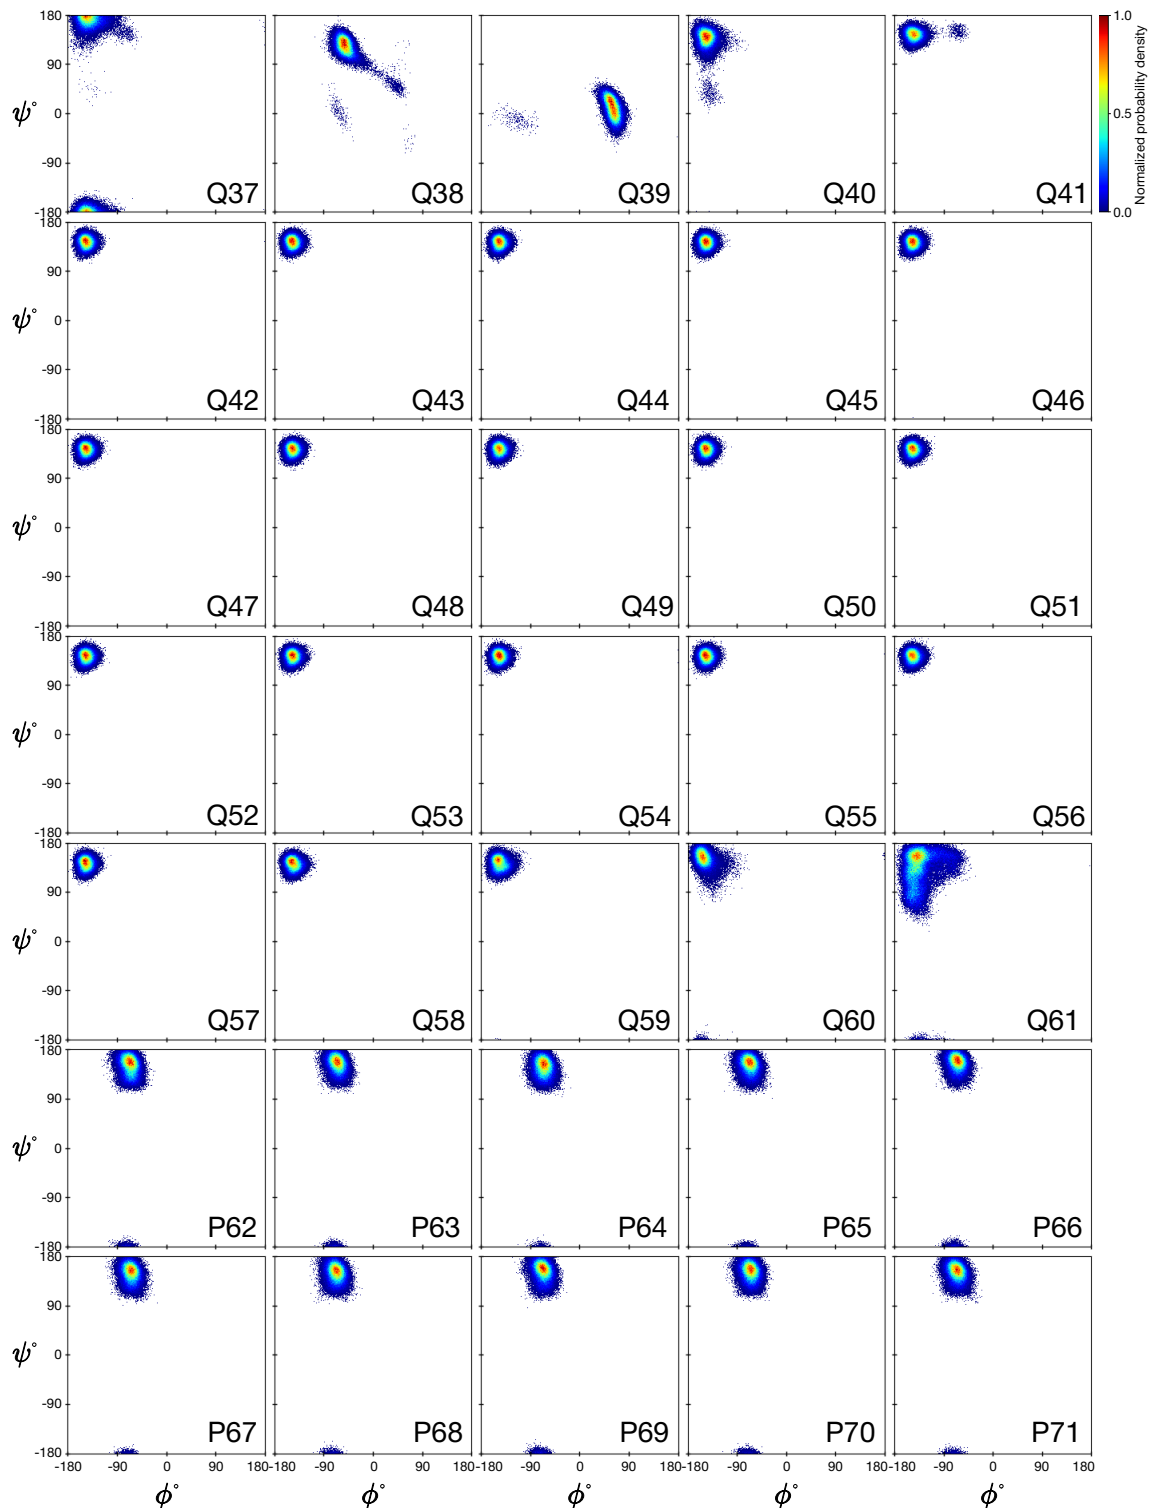

**Figure S19. Ramachandran plots for residues 37–71 in the Q44-HTTex1 fibril.** The plots showcase the conformational space explored by each individual residue, revealing variations in backbone torsion angles across the protein structure. The colorbar is calibrated such that a normalized value of 1 corresponds to the bin with the highest frequency among all protein residues. Each bin spans one degree in both  $\phi$  and  $\psi$ . The distributions were obtained over the last  $1 \mu\text{s}$  of the  $5\text{-}\mu\text{s}$  MD simulation.

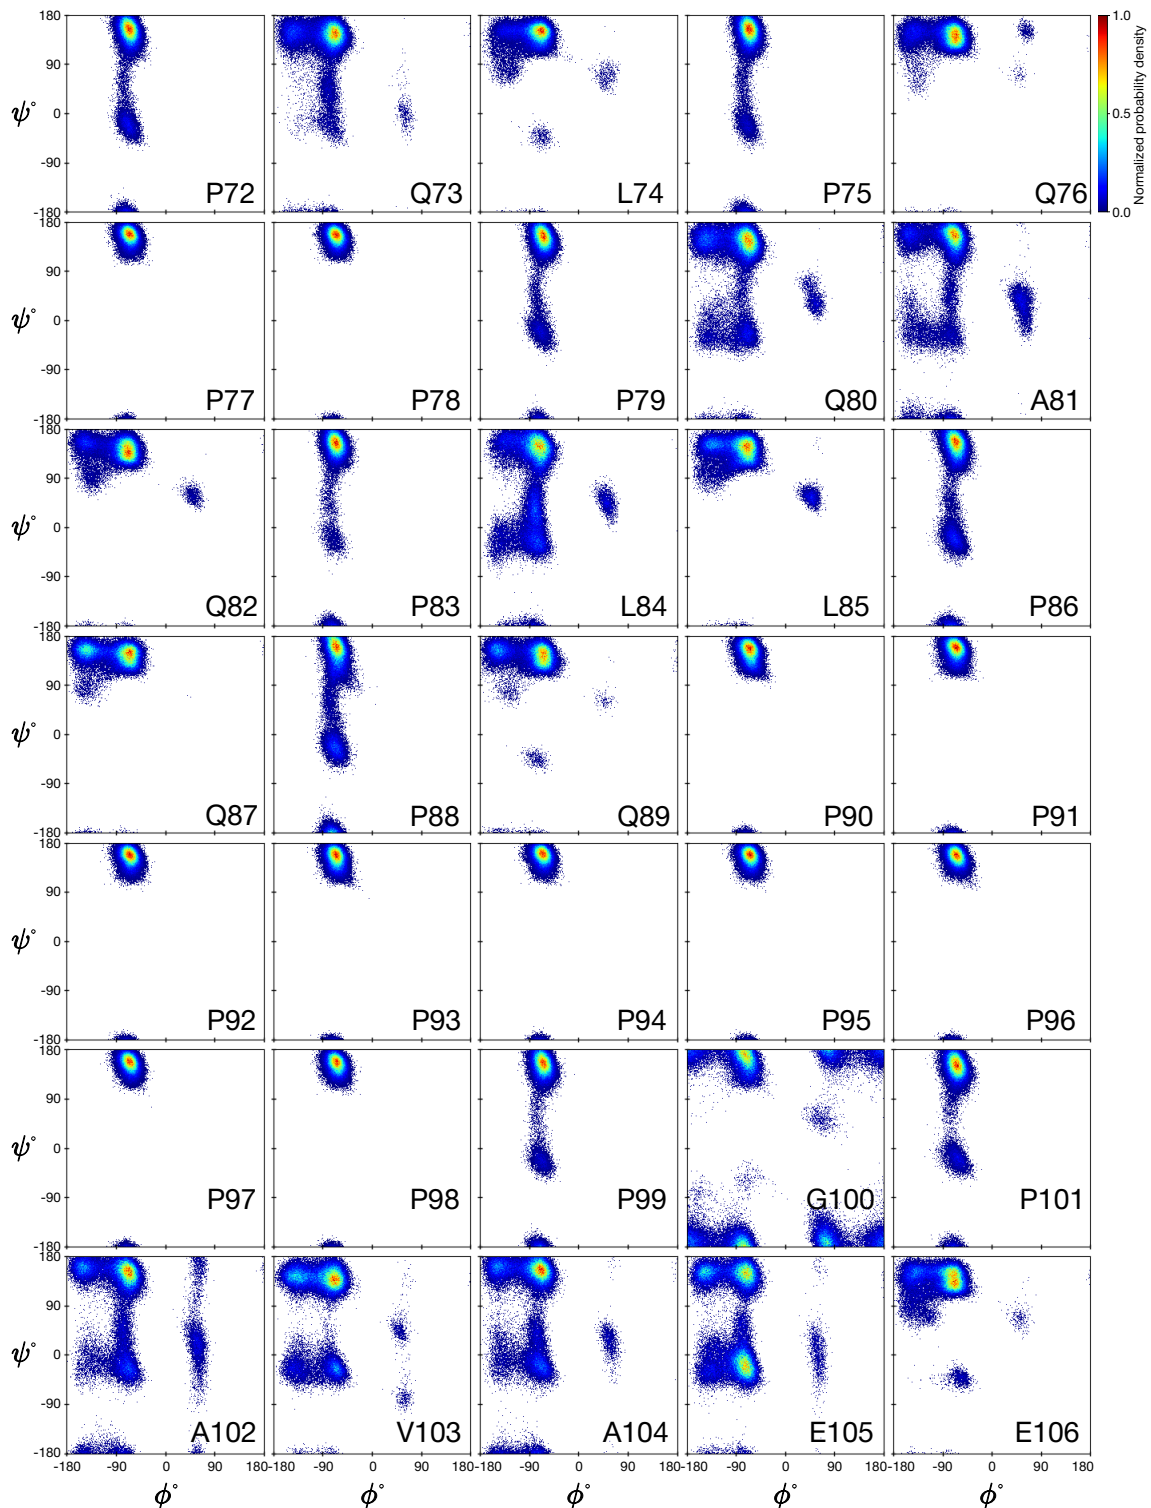

**Figure S20. Ramachandran plots for residues 72–106 in the Q44-HTTex1 fibril.** The plots showcase the conformational space explored by each individual residue, revealing variations in backbone torsion angles across the protein structure. The colorbar is calibrated such that a normalized value of 1 corresponds to the bin with the highest frequency among all protein residues. Each bin spans one degree in both  $\phi$  and  $\psi$ . The distributions were obtained over the last 1  $\mu$ s of the 5- $\mu$ s MD simulation.

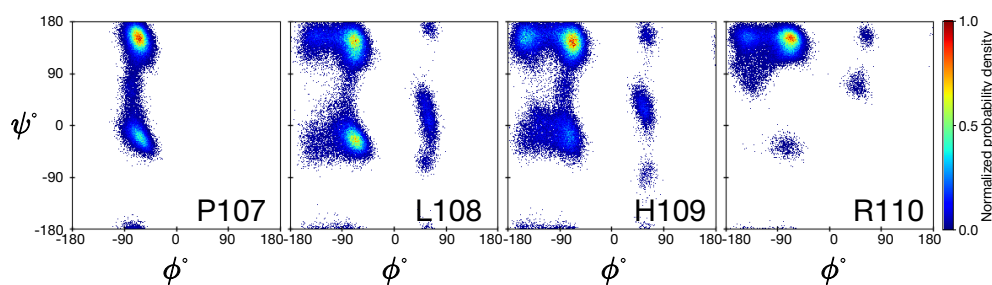

**Figure S21. Ramachandran plots for residues 107–110 in the Q44-HTTex1 fibril.** The plots showcase the conformational space explored by each individual residue, revealing variations in backbone torsion angles across the protein structure. The colorbar is calibrated such that a normalized value of 1 corresponds to the bin with the highest frequency among all protein residues. Each bin spans one degree in both  $\phi$  and  $\psi$ . The distributions were obtained over the last 1  $\mu$ s of the 5- $\mu$ s MD simulation.

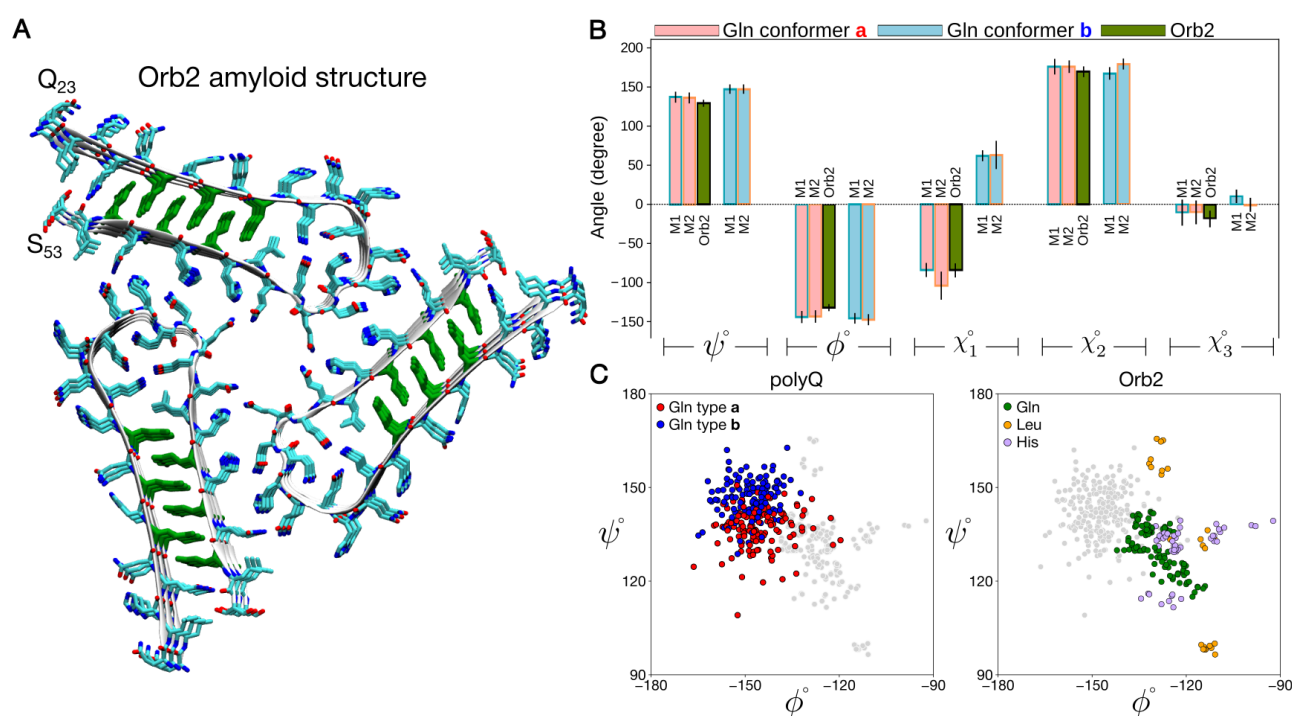

**Figure S22. Comparison of polyQ amyloid fold to that of glutamine-rich functional amyloid Orb2.** (A) Cryo-EM structure of the functional amyloid Orb2, showing its glutamine-rich amyloid core (PDB ID: 6VPS)<sup>9</sup>. Gln residues in the amyloid core are shown in green, where they form an interdigitated zipper sheet–sheet interface just like polyQ amyloid. However, in contrast to polyQ, this protein adopts the more common parallel and in-register  $\beta$ -sheet structure that allows identical residues to stack atop each other. Another noteworthy difference to polyQ is that the polypeptide chain in Orb2 forms a  $\beta$ -arcade,<sup>10</sup> stabilized by intermolecular backbone hydrogen bonds, whereas  $\beta$ -hairpin-containing sheets for expanded polyQ are also stabilized by intra-molecular hydrogen bonding. (B) Depicted are the mean dihedral angle values of  $\psi$ ,  $\phi$ ,  $\chi_1$ ,  $\chi_2$ , and  $\chi_3$  for conformers “a” (displayed in light red) and “b” (displayed in light blue) within the *M1* and *M2* models. The dihedral angles of the Gln residues situated within the core domain (specifically residues 28, 30, 32, 47, 49, and 51) of the Orb2 amyloid structure (PDB ID: 6VPS)<sup>9</sup> are illustrated in green. The error bars represent the standard deviation. (C)  $\beta$ -sheet regions of Ramachandran plots, comparing polyQ Gln residues from model *M1* (left) and the Orb2 residues located within the  $\beta$ -strand regions (residues 24–33 and 45–52) of the Orb2 amyloid structure (right). Each plot shows both polyQ and Orb2; however, in the plot representing polyQ *M1*, the Orb2 residues are shown as grey spots, and conversely, in the plot for Orb2, the polyQ residues are marked in grey.

## References

- [1] Van der Wel PC. Solid-state nuclear magnetic resonance in the structural study of polyglutamine aggregation. *Biochemical Society Transactions* **52** (2024) 719–731. doi:10.1042/BST20230731.
- [2] Boatz JC, Piretra T, Lasorsa A, Matlahov I, Conway JF, van der Wel PC. Protofilament structure and supramolecular polymorphism of aggregated mutant huntingtin exon 1. *Journal of molecular biology* **432** (2020) 4722–4744.
- [3] Hoop CL, Lin HK, Kar K, Magyarfalvi G, Lamley JM, Boatz JC, et al. Huntingtin exon 1 fibrils feature an interdigitated  $\beta$ -hairpin-based polyglutamine core. *Proceedings of the National Academy of Sciences* **113** (2016) 1546–1551.
- [4] Wiegand T, Malär AA, Cadalbert R, Ernst M, Böckmann A, Meier BH. Asparagine and Glutamine Side-Chains and Ladders in HET-s(218–289) Amyloid Fibrils Studied by Fast Magic-Angle Spinning NMR. *Frontiers in Molecular Biosciences* **7** (2020) 582033. doi:10.3389/fmolb.2020.582033.
- [5] Perutz MF, Finch JT, Berriman J, Lesk A. Amyloid fibers are water-filled nanotubes. *Proceedings of the National Academy of Sciences* **99** (2002) 5591–5595.
- [6] Sikorski P, Atkins E. New model for crystalline polyglutamine assemblies and their connection with amyloid fibrils. *Biomacromolecules* **6** (2005) 425–432.
- [7] Maier JA, Martinez C, Kasavajhala K, Wickstrom L, Hauser KE, Simmerling C. ff14sb: improving the accuracy of protein side chain and backbone parameters from ff99sb. *Journal of chemical theory and computation* **11** (2015) 3696–3713.
- [8] Robertson MJ, Tirado-Rives J, Jorgensen WL. Improved peptide and protein torsional energetics with the opl3-aa force field. *Journal of chemical theory and computation* **11** (2015) 3499–3509.
- [9] Hervas R, Rau MJ, Park Y, Zhang W, Murzin AG, Fitzpatrick JAJ, et al. Cryo-EM structure of a neuronal functional amyloid implicated in memory persistence in *Drosophila*. *Science* **367** (2020) 1230–1234. doi:10.1126/science.aba3526.
- [10] Kajava AV, Baxa U, Steven AC. Beta arcades: recurring motifs in naturally occurring and disease-related amyloid fibrils. *FASEB J* **24** (2010) 1311–1319. doi:10.1096/fj.09-145979.
